# Supplementary material for: Outcomes of Patients with Lower Limb Loss after Using a Training Prosthesis: A Retrospective Case Series Study
Source: MDPI journal article supplement (doi:10.3390/healthcare12050567), 2024-02-29
Supplement: s1 [file s1]

**Table S1. Characteristics of the matched population (n=90)**

|                                                                                       | Rehabilitation<br>with TP<br>(n=45) | Rehabilitation<br>without TP<br>(n=45) | <i>p</i> -Value <sup>a</sup> |
|---------------------------------------------------------------------------------------|-------------------------------------|----------------------------------------|------------------------------|
| <b>Sex (men)</b>                                                                      | 32 (71.1)                           | 32 (71.1)                              | 1                            |
| <b>Age (years)</b>                                                                    | 64 (55-70)                          | 62 (55.5-70.5)                         | 0.67                         |
| <b>BMI (kg/m<sup>2</sup>)</b>                                                         | 23.4 (20.6-29.7)                    | 26.5 (20.9-31.4)                       | 0.22                         |
| <b>Vascular etiology (yes)</b>                                                        | 2 (4.44)                            | 5 (11.1)                               | 0.43 <sup>b</sup>            |
| <b>Site of amputation</b>                                                             |                                     |                                        | 0.23                         |
| Unilateral above-knee amputation (yes)                                                | 24 (53.3)                           | 16 (35.5)                              |                              |
| Unilateral below-knee amputation (yes)                                                | 20 (44.4)                           | 27 (60.0)                              |                              |
| Bilateral (yes)                                                                       | 1 (2.22)                            | 2 (4.44)                               |                              |
| <b>Time between amputation and entrance<br/>into the rehabilitation center (days)</b> | 17 (11-27)                          | 20 (14-28)                             | 0.20                         |

TP: Training Prothesis; BMI: Body Mass Index

Qualitative variables are expressed in absolute (n) and relative (%) frequencies; quantitative variables are expressed in median and interquartile range (P25-P75)

<sup>a</sup>p-values obtained from the Mann-Whitney U test for continuous variables and the X<sup>2</sup> test for categorical variables

<sup>b</sup> p-value obtained from the exact Fisher test

**Table S2. Outcomes associated with rehabilitation with or without TP in matched population (n=90)**

|                                                           | n  | Rehabilitation<br>with TP | Rehabilitation<br>without TP | <i>p</i> -Value <sup>a</sup> |
|-----------------------------------------------------------|----|---------------------------|------------------------------|------------------------------|
| <b>Orientation at discharge</b>                           | 90 |                           |                              | 0.33                         |
| Back to home                                              |    | 38 (84.4)                 | 41 (91.1)                    |                              |
| To nursing facilities                                     |    | 7 (15.5)                  | 4 (8.89)                     |                              |
| <b>Length of stay in rehabilitation center<br/>(days)</b> | 88 | 70 (54-92)                | 99 (80-154)                  | <0.001                       |
| <b>Number of sockets required</b>                         | 86 |                           |                              | 0.049                        |
| 1 socket                                                  |    |                           |                              |                              |

|                                                                    |    |           |           |      |
|--------------------------------------------------------------------|----|-----------|-----------|------|
| 2 sockets                                                          |    | 42 (97.7) | 37 (86.1) |      |
| <b>Interventions for size adaptation of the first socket of EP</b> |    | 1 (2.32)  | 6 (13.9)  |      |
|                                                                    | 86 | 1 (0-2)   | 0 (0-1)   | 0.38 |
| <b>Functional group</b>                                            | 71 |           |           | 0.78 |
| Group 0                                                            |    | 10 (24.4) | 4 (13.3)  |      |
| Group 2                                                            |    | 2 (4.88)  | 1 (3.33)  |      |
| Group 3                                                            |    | 18 (43.9) | 16 (53.3) |      |
| Group 4                                                            |    | 5 (12.2)  | 5 (16.7)  |      |
| Group 5                                                            |    | 6 (14.6)  | 4 (13.3)  |      |

---

TP: Training Prothesis; EP: Evaluation prothesis

Qualitative variables are expressed in absolute (n) and relative (%) frequencies; quantitative variables are expressed in median and interquartile range (P25-P75)

<sup>a</sup>p-values obtained from the Mann-Whitney U test for continuous variables and the  $\chi^2$  test for categorial variables
